# Supplementary material for: Metabolomics: a search for biomarkers of visceral fat and liver fat content
Source: PubMed Central journal article supplement (PMC6778586; doi:10.1007/s11306-019-1599-x), 2019-10-05
Supplement: 11306_2019_1599_MOESM5_ESM.pdf [file 11306_2019_1599_MOESM5_ESM.pdf]

## Online Resource 5

**Article title:** Metabolomics: a search for biomarkers of visceral and liver fat content

**Journal name:** Metabolomics

**Author names:**

Sebastiaan Boone<sup>1</sup>, Dennis Mook-Kanamori<sup>1,2</sup>, Frits Rosendaal<sup>1</sup>, Martin den Heijer<sup>1,8</sup>, Hildo Lamb<sup>3</sup>, Albert de Roos<sup>3</sup>, Saskia le Cessie<sup>1,4</sup>, Ko Willems van Dijk<sup>5,6,7</sup>, Renée de Mutsert<sup>1</sup>

**Affiliations:**

1 Department of Clinical Epidemiology, Leiden University Medical Center, Leiden, the Netherlands

2 Department of Public Health and Primary Care, Leiden University Medical Center, Leiden, the Netherlands

3 Department of Radiology, Leiden University Medical Center, Leiden, the Netherlands

4 Department of Biomedical Data Sciences, section Medical Statistics and Bioinformatics, Leiden University Medical Center, Leiden, the Netherlands

5 Department of Endocrinology, Leiden University Medical Center, Leiden, the Netherlands

6 Eindhoven Laboratory for Experimental Vascular Medicine, Leiden University Medical Center, Leiden, the Netherlands

7 Human Genetics, Leiden University Medical Center, Leiden, the Netherlands

8 Endocrinology, VU Medical Centre, Amsterdam, The Netherlands

**Corresponding author:**

S.C. Boone, MD, PhD candidate

Leiden University Medical Center (LUMC), Department of Clinical Epidemiology

PO Box 9600, 2300 RC Leiden

Department C7-P, Postal Zone C7-Q

Fax: +31 (0)71 526 6994

Tel: +31 (0)71 526 4037

Email: s.c.boone@lumc.nl

ORCID: 0000-0002-2411-0699

### Hepatic triglyceride content

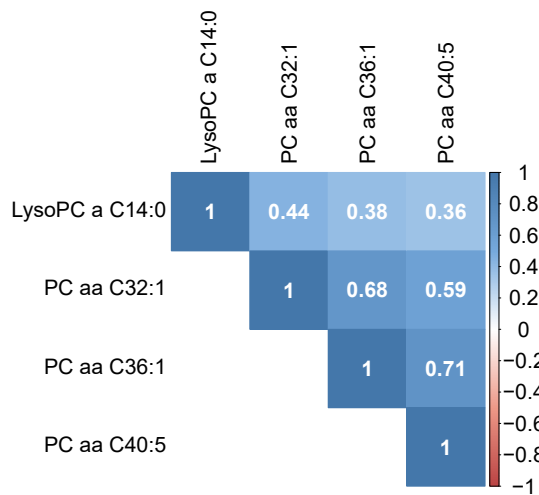

### Visceral adipose tissue

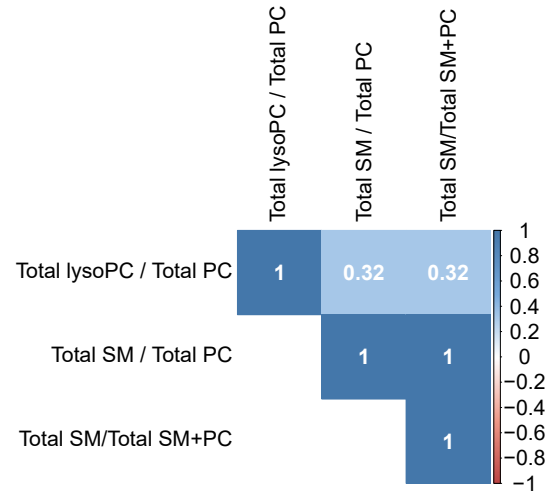

**Online resource 5** Correlation plots of metabolites that were significantly associated with either hepatic triglyceride content or visceral adipose tissue in the complete sample in model 3 (adjusted for age, sex, total body fat percentage, waist circumference and fasting concentrations of triglycerides, HDL-cholesterol, and total cholesterol).
